# Supplementary material
Source: PubMed Central journal article supplement (PMC4386370)
Supplement: pnas.201418549SI.pdf [file pnas.201418549SI.pdf]

# Supporting Information

Baumann et al. 10.1073/pnas.1418549112

## SI Materials and Methods

**Mice.** *Il1r1*<sup>-/-</sup>, *Tbx21*<sup>-/-</sup>, *Stat4*<sup>-/-</sup>, and *Ifngr1*<sup>-/-</sup> mice were bred on a C57BL/6 background. SMARTA1 TCR-tg mice, which express a TCR specific for the LCMV glycoprotein epitope GP61-80, were crossed to Thy1.1<sup>+</sup> B6.PL, *Il1r1*<sup>-/-</sup>, *Tbx21*<sup>-/-</sup>, *Stat4*<sup>-/-</sup>, and *Ifngr1*<sup>-/-</sup> mice to generate TCR<sup>tg</sup> mice on the respective mutant backgrounds.

**Bone Marrow Chimeras and Adoptive Cell Transfer.** WT recipients (CD45.1<sup>+</sup>) of bone marrow (1.5 × 10<sup>7</sup> cells each of WT CD45.1<sup>+</sup> and *Il1r1*<sup>-/-</sup> CD45.2<sup>+</sup>) were lethally irradiated (11 Gy in two doses given 6 h apart) at 1 d before hematopoietic reconstitution, and residual T cells were depleted on the day of reconstitution (100 μg T24 anti-Thy1 antibody i.p.). Recipients were rested for ~ 3 mo for hematopoietic reconstitution before the LCMV challenge was conducted. CD4<sup>+</sup> T cells of Thy1.1<sup>+</sup> SMARTA1 TCR-tg mice of the respective knockout backgrounds (6–8 wk old) were purified by staining with biotinylated antibodies against CD8 (53-6.7), CD11c (N418), CD11b (M1/70), CD19 (1D3), NK1.1 (PK136), Gr1 (RB6-8C5), CD25 (7D4), CXCR3 (CXCR3-173), and ST2 (DJ8), followed by antibiotin microbeads and magnetic depletion (Miltenyi Biotec). For each recipient, 2 × 10<sup>5</sup> cells of the biotin-negative fraction were transferred i.v.

**Primary T-Cell Cultures.** Naive CD4<sup>+</sup> CD62L<sup>hi</sup> CD44<sup>-</sup> cells were sorted from pooled spleen and lymph node cells by FACS. Unless stated differently, T cells were cultured in RPMI 1640 + GlutaMax-I supplemented with 10% (vol/vol) FCS (Gibco; Life Technologies), penicillin (100 U/mL; Gibco; Life Technologies), streptomycin (100 μg/mL; Gibco; Life Technologies), and β-mercaptoethanol (50 ng/mL; Sigma-Aldrich) in the presence of antigen-presenting cells and 1 μg/mL GP64 (LCMV-GP<sub>64-80</sub>). For Th1 differentiation, 5 ng/mL IL-12, 5 ng/mL IL-2, and 10 μg/mL anti-IL-4 (11B11) were added. For Th2 differentiation, 10 ng/mL IL-4, 5 ng/mL IL-2, 10 μg/mL anti-IL-12 (C17.8), and 10 μg/mL anti-IFN-γ (AN18.17.24) were added. On day 4, cells were reactivated with fresh antigen-presenting cells plus 1 μg/mL GP64, and cytokines and blocking cytokine antibodies as above. For resting conditions, cells were cultured at day 8 in fresh medium with 1 ng/mL IL-7 for 5 more days. Recombinant cytokines were purchased from R&D Systems, Peprotech, and Miltenyi Biotec. At the indicated analysis time point, cells were purified with Histopaque

(Sigma-Aldrich) and high-density centrifugation (400 × g at 20 °C for 20 min).

**Flow Cytometry Analysis.** Surface receptor staining and intracellular cytokine, transcription factor, and pSTAT4 staining procedures have been described previously (1). The LCMV-specific CD8<sup>+</sup> T-cell response to the dominant glycoprotein-derived epitope GP33 was assessed by MHC class I tetramer staining as described previously (2). The LCMV-specific CD4<sup>+</sup> T-cell response was assessed by MHC class II tetramer staining. For these analyses, phycoerythrin-conjugated I-Ab MHC class II tetramer complexes loaded with either the LCMV glycoprotein aa66-77 epitope DIYKGVYQFKSV or the human CLIP-derived aa87-101 epitope PVSKMRMATPLMQA were generously provided by the US National Institutes of Health's Tetramer Facility.

For intracellular staining of p38 protein phosphorylation, cells were starved for 4 h in serum-free medium and treated with or without IL-33 (30 ng/mL) for another 30 min. Cells were subsequently fixed with prewarmed 1× BD Phosflow Lyse/Fix Buffer for 10 min at 37 °C. Cells were permeabilized with ice-cold BD Phosflow Perm Buffer III for 30 min on ice, then stained for 30 min with PE anti-phospho-p38 (36/p38, BD Biosciences). Additional FACS analysis, not described before, included surface marker stainings for Ly6C (AL-21; BD Biosciences) and CCR6 (140706; R&D Systems), intracellular staining of IL-17A (TC11-18H10.1; Biolegend) after restimulation with PMA and ionomycin, and intracellular transcription factor staining of FoxP3 (FJK-16s; eBioscience) and RORγt (Q31-378; BD Biosciences).

**Gene Expression Analysis.** mRNA of in vitro-generated Th cells was isolated with the NucleoSpin RNA II Kit (Macherey Nagel) according to the manufacturer's instructions. cDNA was prepared with TaqMan reverse-transcription reagents and quantified with SYBR Select (both from Applied Biosystems). *Il1r1* (forward, CAAGTAGGACCTGTGTGCC; reverse, CGTGT-CCAACAATTGACCTG) was normalized to *Hprt* (forward, TCCTCCTCAGACCGCTTTT; reverse, CATAACCTGGTTCATCATCGC).

**Virus.** The LCMV-WE strain was propagated on L-929 cells. LCMV stocks were titrated by standard immunofocus assays on MC57G cells as described previously (3). Mice were infected i.v. with 200 or 2 × 10<sup>6</sup> PFU in 200 μL of MEM.

1. Peine M, et al. (2013) Stable T-bet(+)/GATA-3(+) Th1/Th2 hybrid cells arise in vivo, can develop directly from naive precursors, and limit immunopathologic inflammation. *PLoS Biol* 11(8):e1001633.
2. Gallimore A, et al. (1998) Induction and exhaustion of lymphocytic choriomeningitis virus-specific cytotoxic T lymphocytes visualized using soluble tetrameric major histocompatibility complex class I-peptide complexes. *J Exp Med* 187(9):1383–1393.

3. Löhning M, et al. (2008) Long-lived virus-reactive memory T cells generated from purified cytokine-secreting T helper type 1 and type 2 effectors. *J Exp Med* 205(1): 53–61.

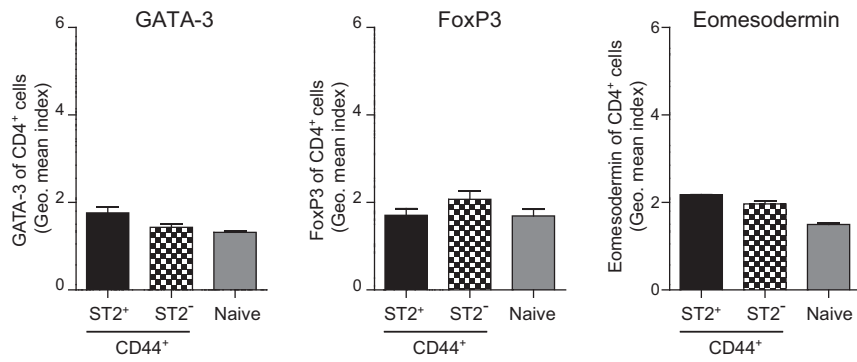

**Fig. S1.** ST2<sup>+</sup> and ST2<sup>-</sup> effector CD4<sup>+</sup> T cells show similar expression of GATA-3, FoxP3, and Eomesodermin. Shown is a comparison of splenic ST2<sup>+</sup> and ST2<sup>-</sup> effector CD4<sup>+</sup> T cells analyzed by flow cytometry at day 8 after LCMV infection ( $2 \times 10^6$  PFU). Effector CD4<sup>+</sup> T cells were defined by CD44 expression. GMIs are shown for GATA-3, FoxP3, and Eomesodermin. Naive CD4<sup>+</sup> T cells (CD62L<sup>hi</sup> and CD44<sup>-</sup>) served as controls. Bars represent mean + SD ( $n = 3$ ). All data are representative of two independent experiments.

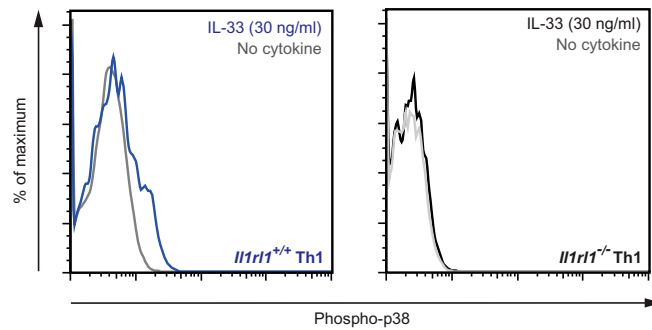

**Fig. S2.** ST2 downstream signaling is triggered by IL-33 in Th1 cells. Naive *Il1r1*<sup>+/+</sup> and *Il1r1*<sup>-/-</sup> LCMV-TCR<sup>tg</sup> CD4<sup>+</sup> T cells were differentiated to Th1 cells for 8 d, starved for 4 h, and then treated with 30 ng/mL IL-33. Representative histograms are shown for intracellular phosphorylated p38 protein in *Il1r1*<sup>+/+</sup> and *Il1r1*<sup>-/-</sup> cells ( $n = 3$ ).

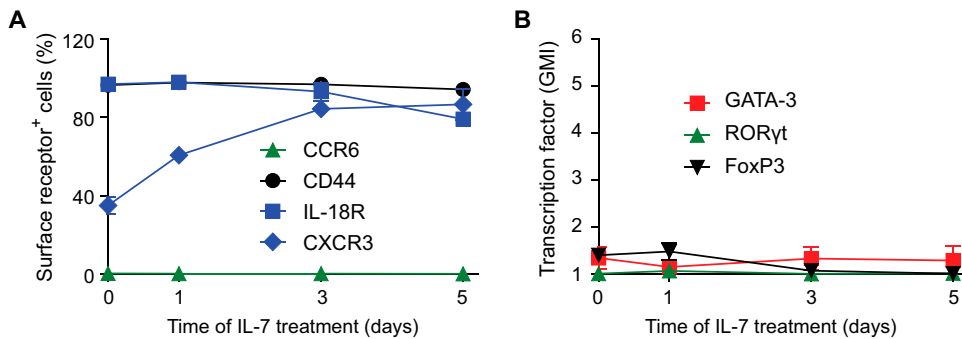

**Fig. S3.** Th1 cells do not lose their differentiation phenotype during resting culture conditions with IL-7. Naive LCMV-TCR<sup>tg</sup> CD4<sup>+</sup> T cells were differentiated to Th1 cells for 8 d and then placed into a resting condition in fresh medium with IL-7 for another 5 d. Shown are the frequencies of cells expressing the surface markers CCR6, CD44, IL-18R, and CXCR3 (A) and the GMIs of GATA-3, RORγt, and FoxP3 (B). Symbols represent mean ± SD values of two pooled, independent experiments.





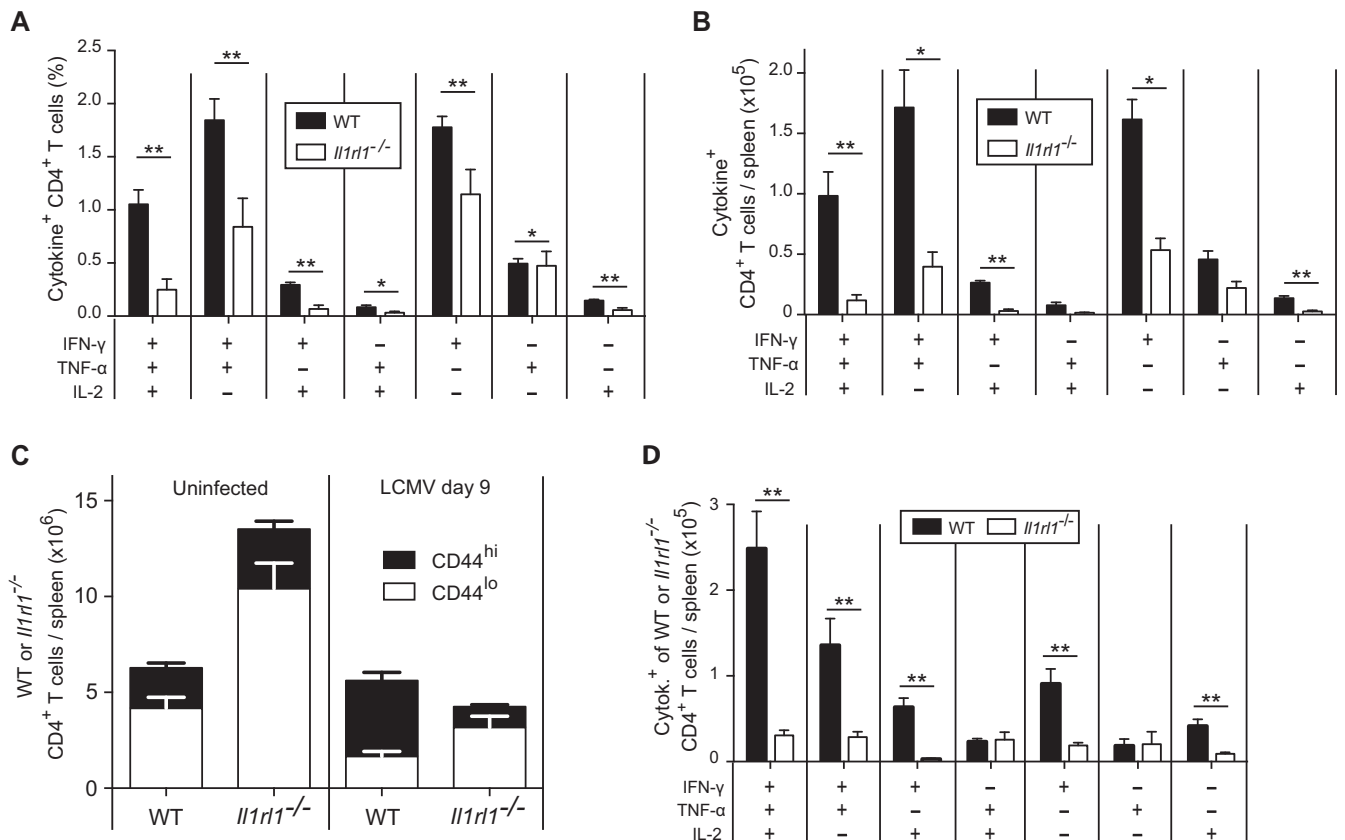

**Fig. 57.** Reduced numbers of cytokine-producing ST2-deficient CD4<sup>+</sup> T cells in viral infection. (A and B) WT and *Il1rl1*<sup>-/-</sup> mice were infected with LCMV, and on day 8 postinfection, the frequencies (A) and absolute numbers (B) of GP64-specific splenic CD4<sup>+</sup> T cells expressing IFN- $\gamma$ , TNF- $\alpha$ , IL-2, or combinations thereof were determined. The same data were used for the analysis displayed in Fig. 4A. (C and D) Irradiated WT recipients were reconstituted with WT (CD45.1<sup>+</sup>) and *Il1rl1*<sup>-/-</sup> (CD45.2<sup>+</sup>) bone marrow at a 1:1 ratio. Analyses were conducted after hematopoietic reconstitution, either before (C, Left) or 9 d after (C, Right and D) LCMV infection. Numbers of splenic WT and *Il1rl1*<sup>-/-</sup> CD4<sup>+</sup> T cells, either CD44<sup>hi</sup> or CD44<sup>lo</sup>, were determined by flow cytometry before (uninfected) and at 9 d after LCMV infection. (D) Absolute numbers of splenic WT and *Il1rl1*<sup>-/-</sup> CD4<sup>+</sup> T cells expressing IFN- $\gamma$ , TNF- $\alpha$ , IL-2, or combinations thereof after GP64 peptide restimulation. Frequencies calculated from the same datasets are shown in Fig. 4E. Bars represent mean + SEM values of four mice (A, B, and the uninfected group in C) or six mice (LCMV-infected group in C and D). A, B, and D show representative results of two independent experiments.

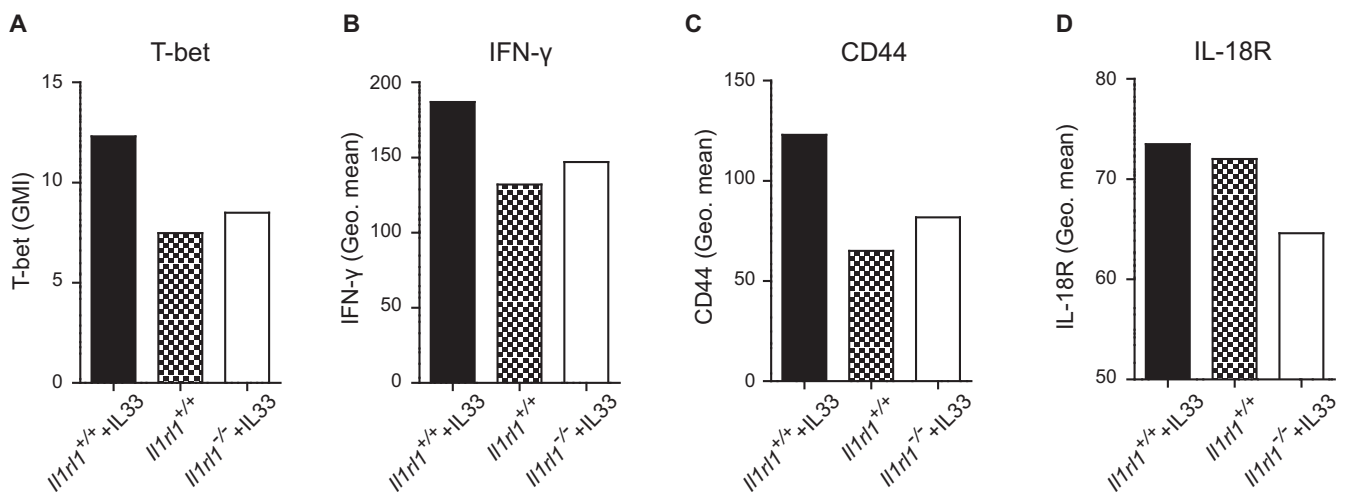

**Fig. 58.** Lack of IL-33 signals leads to an impaired Th1 phenotype during in vitro differentiation with low IL-12 amounts. Naive *Il1rl1*<sup>+/+</sup> and *Il1rl1*<sup>-/-</sup> LCMV-TCR<sup>tg</sup> CD4<sup>+</sup> T cells were differentiated to Th1 cells with suboptimal IL-12 concentration (0.5 ng/mL) in the presence or absence of IL-33 (10 ng/mL) for 8 d. Cells were analyzed by flow cytometry for expression of T-bet (A), IFN- $\gamma$  after restimulation with PMA and ionomycin (B), CD44 (C), and IL-18R (D). One representative culture is shown from two or three independent experiments.
